# Supplementary material for: Carbon monoxide fluxes measured using the eddy covariance method from an intensively managed grassland in Ireland
Source: Royal Society of Chemistry journal article supplement (doi:10.1039/d3ea00112a), 2023-01-01
Supplement: d3ea00112a1.pdf [file d3ea00112a1.pdf]

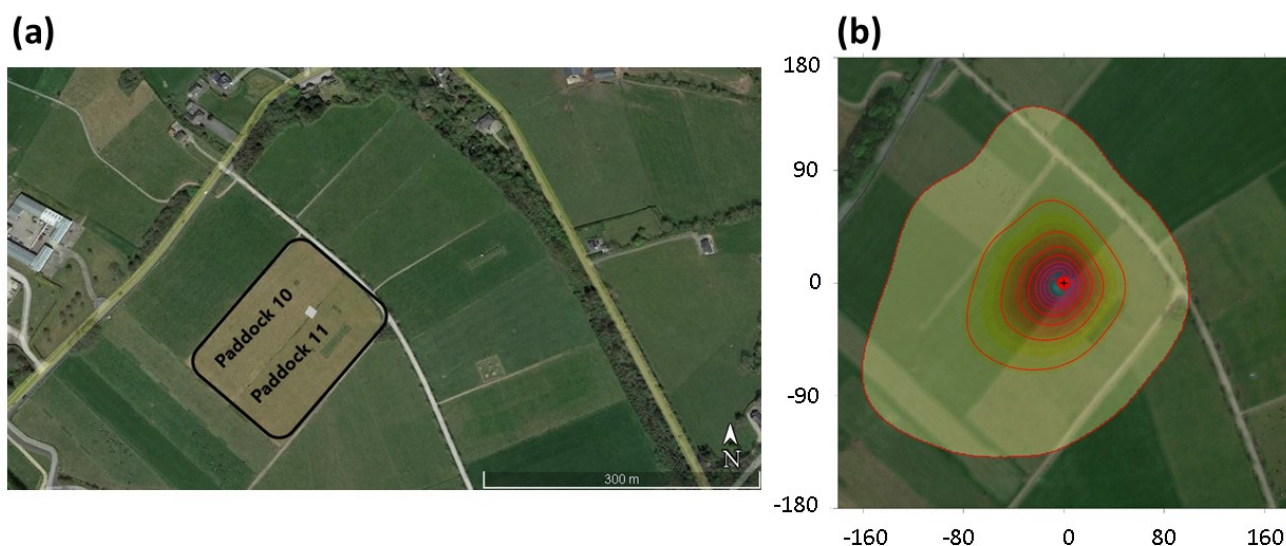

**Figure S1:** (a) Experimental field site where the black boundary represents the field site which comprises of two paddocks, paddock 10 and 11, and the grey square marks the location of the eddy covariance tower. Image sourced from Google Earth (<https://earth.google.com/web/>). (b) The flux footprint of the EC tower calculated using the footprint model outlined in Kljun et al. (2015). The footprint contour lines represent 10–90% of the flux source in 10% increments. The axis represents distance (metres) from the EC tower (black cross).
