# Supplementary material for: Carbon monoxide fluxes measured using the eddy covariance method from an intensively managed grassland in Ireland
Source: Royal Society of Chemistry journal article supplement (doi:10.1039/d3ea00112a), 2023-01-01
Supplement: d3ea00112a2.pdf [file d3ea00112a2.pdf]

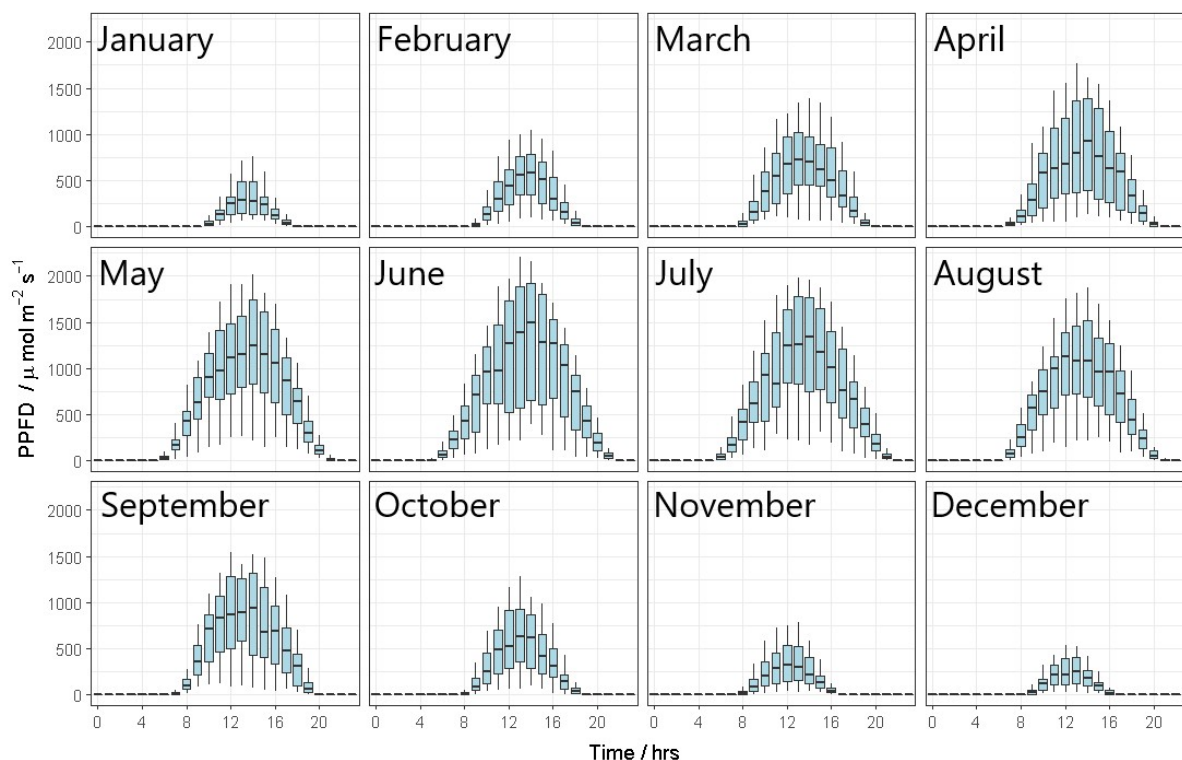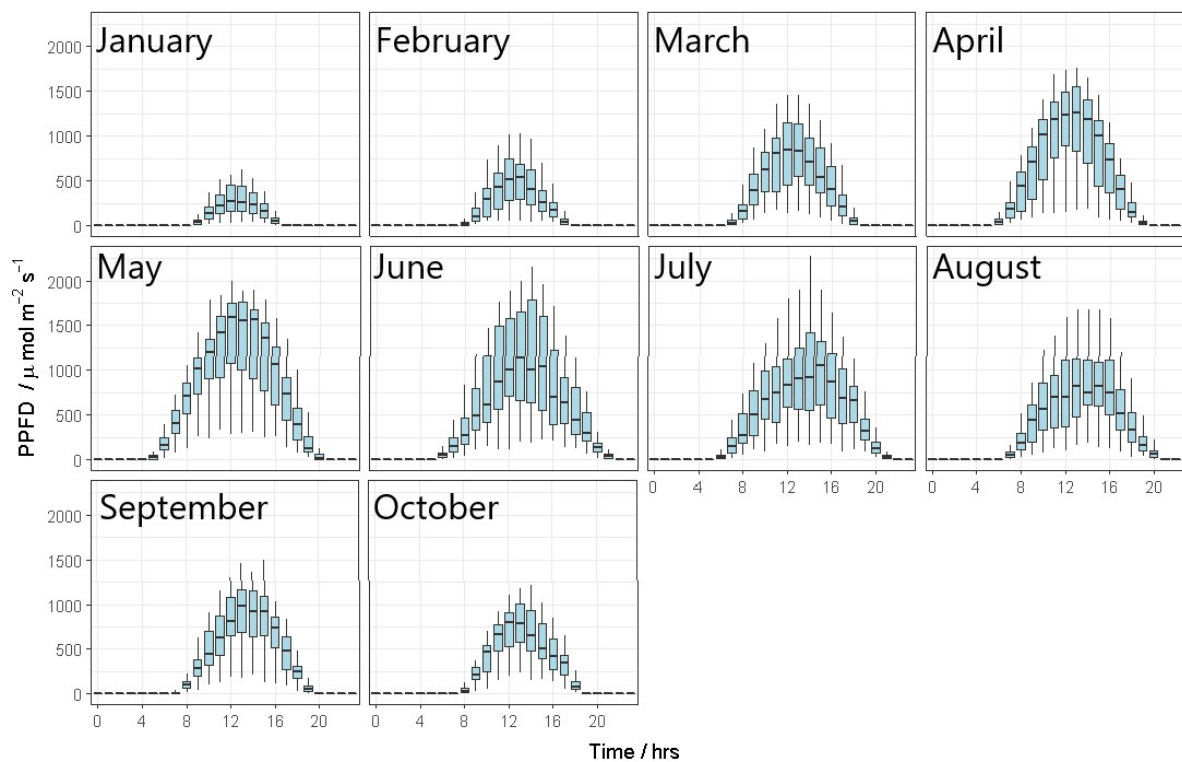

**Figure S2:** Monthly diurnal trends in the photon photosynthetic flux density (PPFD) measured in 2019 (top) and 2020 (bottom). The centre line in the box plot represents the median and the whiskers either side represent the 95% confidence interval.
