# Supplementary material for: Carbon monoxide fluxes measured using the eddy covariance method from an intensively managed grassland in Ireland
Source: Royal Society of Chemistry journal article supplement (doi:10.1039/d3ea00112a), 2023-01-01
Supplement: d3ea00112a3.pdf [file d3ea00112a3.pdf]

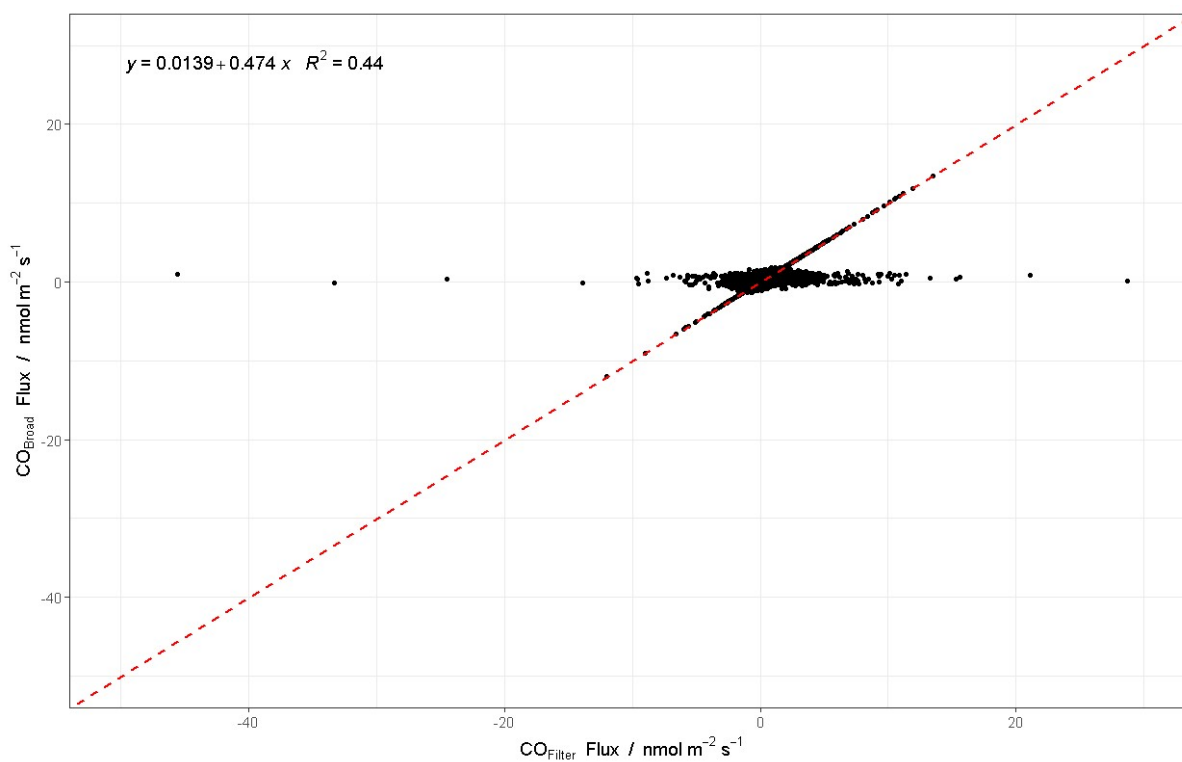

**Figure S3:** The relationship between modelled CO fluxes including anthropogenic sources ( $\text{CO}_{\text{Broad}}$ ) (y-axis) and excluding anthropogenic sources  $\text{CO}_{\text{Filter}}$  (x-axis). The dashed red line represents a 1:1 relationship.
