# Supplementary material for: Carbon monoxide fluxes measured using the eddy covariance method from an intensively managed grassland in Ireland
Source: Royal Society of Chemistry journal article supplement (doi:10.1039/d3ea00112a), 2023-01-01
Supplement: d3ea00112a5.pdf [file d3ea00112a5.pdf]

**Table S1:** Summary of the management activities for 2019 and 2020. Orange squares represent the application rate of calcium ammonium nitrate



(CAN) and green squares represent silage cuts (2019) or grazing events (2020).
